# Supplementary material
Source: PubMed Central journal article supplement (PMC3414412)
Supplement: cbt-13-899-s01.pdf [file cbt-13-899-s01.pdf]

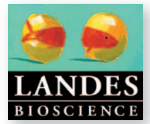

## **Supplemental Material to:**

**Ru Chen, Sheng Pan, Niki A. Ottenhof, Roeland F. de Wilde,  
Christopher L. Wolfgang, Zhaoli Lane, Jane Post,  
Mary P. Bronner, Jürgen K. Willmann, Anirban Maitra  
and Teresa A. Brentnall**

**Stromal galectin-1 expression is associated with long-term  
survival in resectable pancreatic ductal adenocarcinoma**

**Cancer Biology & Therapy 2012; 13(10)**

**<http://dx.doi.org/10.4161/cbt.20842>**

**<http://www.landesbioscience.com/journals/cbt/article/20842/>**

**Table S1. Pancreatic cancer tissues for proteomics analysis****VERY LONG TERM SURVIVORS**

| SP#    | Size | #LN Positive | #LN Examined | LN ration | Degree of Differentiation | Differentiation grade | Age | survival time   | Gender | TNM    | Stage |
|--------|------|--------------|--------------|-----------|---------------------------|-----------------------|-----|-----------------|--------|--------|-------|
| VLTS19 | 3    | 0            | 14           | 0         | poor                      | G3                    | 68  | Alive (>10 yrs) | M      | T3N0Mx | IIA   |
| VLTS13 | 1.8  | 1            | 4            | 0.25      | moderate                  | G2                    | 70  | Alive (>10 yrs) | F      | T3N1Mx | IIB   |
| VLTS9  | 4    | 1            | 11           | 0.0909091 | moderate                  | G2                    | 44  | Alive (>10 yrs) | M      | T3N1Mx | IIB   |
| VLTS18 | 1.8  | 0            | 15           | 0         | moderate                  | G2                    | 68  | Alive (>10 yrs) | F      | T2N0Mx | IB    |
| VLTS23 | 3.5  | 2            | 34           | 0.0588235 | moderate                  | G2                    | 56  | 11 yrs          | M      | T3N1Mx | IIB   |

**SHORT TERM SURVIVORS**

|      |     |   |    |           |          |    |    |           |   |        |  |
|------|-----|---|----|-----------|----------|----|----|-----------|---|--------|--|
| STS2 | 5   | 1 | 14 | 0.0714286 | moderate | G2 | 53 | 14 months | M | T3N1Mx |  |
| STS3 | 3.5 | 0 | 25 | 0         | moderate | G2 | 60 | 8 months  | F | T3N0Mx |  |
| STS4 | 2.8 | 0 | 10 | 0         | moderate | G2 | 64 | 11 months | F | T3N0Mx |  |
| STS7 | 3.5 | 0 | 25 | 0         | poor     | G3 | 63 | 11 months | F | T3N0Mx |  |
| STS5 | 3   | 2 | 26 | 0.0769231 | moderate | G2 | 69 | 6 months  | M | T3N1Mx |  |
